# Supplementary material
Source: Research Square preprint supplement (doi:10.21203/rs.3.rs-8775364/v1)
Supplement: Supplementary file 1 [file 384964d6a22a0f4038515f30.docx]

SUPPLEMENTARY INFORMATION

**Table S1 Snapshot of JEV detections in mosquitoes and pigs in Australia during the summer of 2024/2025**

| **Species** | **Date** | **Region** | **Reference** |
| --- | --- | --- | --- |
| Mosquito | Dec 2024 | Griffith (Murrumbidgee region) NSW | <https://www.health.nsw.gov.au/environment/pests/vector/Publications/arbovirus-surveillance-weekly-report-2024-dec-07.pdf> |
| Mosquito | Jan 2025 | Moree, NSW | <https://thephn.com.au/news/japanese-encephalitis-virus-detected-in-mosquito-samples-from-moree-advice-for-providers> |
| Mosquito | Late 2024/early 2025 | Moira Shire northern Vic | <https://agriculture.vic.gov.au/biosecurity/animal-diseases/mosquitoes-controlling-and-reporting-mosquito-borne-illnesses/Japanese-encephalitis/Japanese-encephalitis-current-situation> |
| Mosquito | Feb 2025 | Monto, North Burnett, Qld | <https://northburnett.qld.gov.au/japanese-encephalitis-virus-detected-in-mosquitos-in-monto/> |
| Mosquito | March 2025 | Hemmant, Brisbane, Qld | <https://www.health.qld.gov.au/newsroom/doh-media-releases/be-alert-against-mosquitoes-as-jev-detected-in-brisbane>? |
| Pig (feral) | Dec 2024 | Yomingley (near Dubbo), Western NSW | <https://www.dpi.nsw.gov.au/__data/assets/pdf_file/0010/1596214/CVO-Bulletin-JEV-detection-Feral-Pigs-Dec-2024.pdf> |
| Pig (farmed) | Feb 2025 | Goulburn Valley | <https://agriculture.vic.gov.au/biosecurity/animal-diseases/mosquitoes-controlling-and-reporting-mosquito-borne-illnesses/japanese-encephalitis/japanese-encephalitis-current-situation> |
| Pig (farmed) | Feb 2025 | Southern Qld | <https://www.abc.net.au/news/2025-02-18/japanese-encephalitis-virus-queensland-piggeries/104949206> |
| Pig | Apr 2025 | Banana Shire (Central Qld) | <https://www.health.qld.gov.au/newsroom/doh-media-releases/be-alert-against-mosquitoes-as-jev-detected-in-central-queensland> |

**Table S2 JEV Human Cases and Fatalities in Australia (Dec 2024 – 2025)**

| Date (published) | State | | Case/Fatality* | Age/Sex | Probable Exposure location | Source | Website |
| --- | --- | --- | --- | --- | --- | --- | --- |
| 17 Jan 2025 | | QLD | Case | Not disclosed | Yelarbon / Goondiwindi | ABC News | <https://www.abc.net.au/news/2025-01-17/mosquito-dengue-fever-japanese-encephalitis-cases-queensland/104828632> |
| 15 Feb 2025 | | NSW | Case | Male | Murrumbidgee region | NSW Health | <https://www.health.nsw.gov.au/news/Pages/20250215_00.aspx> |
| 25 Feb 2025 | | NSW | Fatality | Male, Age: 70s | Murrumbidgee region | NSW Health/ABC | <https://www.abc.net.au/news/2025-02-25/sydney-man-dies-japanese-encephalitis-mosquito/104979634> |
| 25 Feb 2025 | | NSW | Case | Female, Age: 60s | Northern NSW | NSW Health/ABC | <https://www.abc.net.au/news/2025-02-25/sydney-man-dies-japanese-encephalitis-mosquito/104979634> |
| 3 Mar 2025 | | VIC | Case | Not disclosed | NSW Riverina / Murray River | Victoria Health | <https://www.health.vic.gov.au/health-alerts/japanese-encephalitis-in-victoria> |
| 1 Apr 2025 | | QLD | Fatality | Male | Under investigation (Bowen/Mackay) | Queensland Health | https://www.abc.net.au/news/2025-04-01/queenslander-likely-died-from-japanese-encephalitis-virus/105123982 |
| 5 Apr 2025 | | QLD | Fatality | Not disclosed | Queensland (not specified) | ABC News | https://www.abc.net.au/news/2025-04-05/mosquito-japenese-encephalitis-dengue-fever-rain-flood/105133696 |
| 20 Dec 2024 | | VIC | Case | Not disclosed | Northern Victoria (likely Murray River) | Victoria Health |  |

*****case numbers for the 2024/2025 as of August 2025, as reported by the Australian notifiable conditions reports for each state, Qld Health (<https://www.health.qld.gov.au/clinical-practice/guidelines-procedures/diseases-infection/surveillance/reports/notifiable>); NSW Health (<https://www.health.nsw.gov.au/Infectious/Pages/data.aspx>) and Department of Health, Victoria (<https://www.health.vic.gov.au/infectious-diseases/notifiable-infectious-diseases-conditions-and-micro-organisms>).

**Table S3** Inactivation kinetics of BinJ/JEVNSW22 as clarified cell culture supernatant

| Passage | **Day 7*** | **Day 14*** | **Day 21*** | **Day 28*** |
| --- | --- | --- | --- | --- |
| **BinJ/JEVNSW22 + 0.05% formalin at 4°C** | | | | |
| 1 (T75) | ++ | + | + | - |
| 2 (T25) | +++ | +++ | +++ | - |
| 3 (T25) | not imaged | not imaged | +++ | - |
| **BinJ/JEVNSW22 + 0.08% formalin at 4°C** | | | | |
| 1 (T75) | ++ | + | + | - |
| 2 (T25) | +++ | ++ | not imaged | - |
| 3 (T25) | not imaged | not imaged | not imaged | **-** |
| **BinJ/JEVNSW22 + 0.10% formalin at 4°C** | | | | |
| 1 (T75) | ++ | - | - | - |
| 2 (T25) | +++ | + | - | - |
| 3 (T25) | not imaged | not imaged | - | - |
| **BinJ/JEVNSW22 + 0% formalin at 4°C (positive control; 4.40 x 107 IU/mL)** | | | | |
| 1 (T75) | +++ | +++ | +++ | +++ |
| 2 (T25) | +++ | +++ | +++ | +++ |
| 3 (T25) | not imaged | not imaged | +++ | +++ |
| **Mock-infected C6/36 culture supernatant + 0.10% formalin at 4°C (negative control)** | | | | |
| 1 (T75) | - | - | - | - |
| 2 (T25) | - | - | - | - |
| 3 (T25) | not imaged | not imaged | - | - |

*Day post formalin addition

T25, T75 denotes the flask size for culture supernatant passaging

**Table S4**. Serological response of weaner pigs to BinJ/JEVNSW22 vaccination and later JEV infection challenge determined using a JEV blocking ELISA. Pigs were vaccinated on with a priming dose on Day 0 (5 weeks of age) and a booster of the same vaccine preparations were administered to 9 pigs per treatment group on Day 28 (9 weeks of age). Positive results were distinguished by a percentage inhibition (PI) in the assay >60 at the screening dilution of 1/10.

| **Treatment group** | **JEV antibody positive % (n=9)** | | | | | | | | | | |
| --- | --- | --- | --- | --- | --- | --- | --- | --- | --- | --- | --- |
| **Priming dose** | | | | | **Booster dose** | | | **JEV infection challenge** | | |
| **Day 0** | **Day 7** | **Day 14** | **Day 21** | **Day 28** | | **Day 35** | **Day 42** | **Day 49** | **Day 56** | **Day 63** |
| 1. No vaccine | 0 | 11* | 0 | 11* | 0 | | 0 | 0 | 100 | 100 | 100 |
| 2. BinJ/JEVNSW22 (pure, not inactivated) | 0 | 100 | 67 | 11 | 67 | | 100 | 100 | 100 | not tested | |
| 3. Inactivated BinJ/JEVNSW22, higher dose, clarified supernatant | 0 | 100 | 89 | 78 | 89 | | 100 | 100 | 100 | 100 | 100 |
| 4. Inactivated BinJ/JEVNSW22, lower dose, clarified supernatant | 0 | 100 | 89 | 67 | 56 | | 100 | 100 | 100 | 100 | 100 |
| 5. Inactivated BinJ/JEVNSW22, higher dose, clarified supernatant, no emulsigen | 0 | 78 | 33 | 56 | 56 | | 100 | 78 | not tested | | |

* One sample was just above the positive PI value, but in each case the subsequent blood sample from each individual pig gave a negative result.

**Table S5.** Serological response of pigs after second dose of BinJ/JEVNSW22 vaccine (D28) and challenge at D42. Titres determined by testing serial dilutions of serum in JEV bELISA. The endpoint was determined to be the last dilution before a negative result was obtained (PI>40%)

| **Treatment Group** | **Animal ID** | **Days from first vaccination (challenge D42)** | | | | |
| --- | --- | --- | --- | --- | --- | --- |
| **D35** | **D42** | **D49** | **D56** | **D63** |
| **1. No vaccine** | 90003 | 0 | 0 | 320 | 160 | 320 |
| 90016 | 0 | 0 | 160 | 320 | 640 |
| 90017 | 0 | 0 | 640 | 640 | 1280 |
| 90019 | 0 | 0 | 320 | 640 | 1280 |
| 90025 | 0 | 0 | 320 | 320 | 640 |
| 90027 | 0 | 0 | 320 | 320 | 640 |
| 90063 | 0 | 0 | 320 | 320 | 1280 |
| 90064 | 0 | 0 | 320 | 320 | 640 |
| 90066 | 0 | 0 | 160 | 640 | 320 |
| **3. Inactivated BinJ/JEVNSW22, higher dose, clarified supernatant** | 90000 | >5120 | 2560 | 1280 | 2560 | 1280 |
| 90001 | 1280 | 640 | 640 | 640 | 640 |
| 90004 | 2560 | 2560 | 2560 | 2560 | 2560 |
| 90014 | 5120 | 2560 | 1280 | 1280 | 1280 |
| 90030 | 1280 | 640 | 640 | 1280 | 1280 |
| 90042 | 80 | 320 | 320 | 1280 | 5120 |
| 90051 | >5120 | 2560 | 1280 | 10240 | 10240 |
| 90062 | 5120 | 10240 | 2560 | 2560 | 2560 |
| 90071 | >5120 | 1280 | 1280 | 1280 | 1280 |
| **4. Inactivated BinJ/JEVNSW22, lower dose, clarified supernatant** | 90018 | 2560 | 1280 | 640 | 1280 | 2560 |
| 90023 | 640 | 640 | 1280 | 5120 | 10240 |
| 90024 | 2560 | 640 | 1280 | 1280 | 2560 |
| 90039 | 1280 | 640 | 1280 | 2560 | 2560 |
| 90046 | 5120 | 640 | 2560 | 10240 | >10240 |
| 90049 | >5120 | 1280 | 640 | 2560 | 2560 |
| 90052 | 2560 | 640 | 640 | 1280 | 1280 |
| 90058 | >5120 | 1280 | 640 | 1280 | 5120 |
| 90068 | 1280 | 640 | 640 | 1280 | 1280 |

**Table S6:** Neutralising antibody response of pigs on the day of JEV challenge (2 weeks post-booster vaccine dose). Titres were determined by testing serial dilutions of serum in JEV PRNT50 or microneutralisation50 assay. The titres were defined as the highest dilution that results in a 50% reduction of plaques or staining, respectively.

| **Treatment Group** | **Animal ID** | **PRNT50 Titre** | | **Microneut50** |
| --- | --- | --- | --- | --- |
| **D0** | **D42** | **D42** |
| 1. No Vaccine | 90019 | <10 | <10 | <10 |
| 90063 | <10 | <10 | <10 |
| 90025 | <10 | <10 | <10 |
| 90003 | <10 | <10 | <10 |
| 90064 | <10 | <10 | <10 |
| 90066 | <10 | <10 | <10 |
| 90017 | <10 | <10 | <10 |
| 90027 | <10 | <10 | <10 |
| 90016 | <10 | <10 | <10 |
| 2. BinJ/JEVNSW22 (pure, non-inactivated) | 90013 | <10 | 160 | 80 |
| 90022 | <10 | 320 | 80 |
| 90048 | <10 | 160 | 80 |
| 90029 | <10 | >1280 | 160 |
| 90026 | <10 | >1280 | 80 |
| 90072 | <10 | 160 | 40 |
| 90040 | <10 | 40 | 20 |
| 90005 | <10 | 160 | 40 |
| 90055 | <10 | 160 | 80 |
| 3. Inactivated BinJ/JEVNSW22, higher dose, clarified supernatant | 90042# | <10 | <10* | <10 |
| 90051 | <10 | 160 | 80 |
| 90001 | <10 | 40 | 40 |
| 90004 | <10 | 160 | 80 |
| 90062 | <10 | 320 | 80 |
| 90014 | <10 | 40 | 80 |
| 90071 | <10 | 40 | 20 |
| 90000 | <10 | 40 | 40 |
| 90030 | <10 | 80 | 20 |
| 4. Inactivated BinJ/JEVNSW22, lower dose, clarified supernatant | 90018 | <10 | 160 | 40 |
| 90039 | <10 | 10 | 10 |
| 90058 | <10 | 40 | 40 |
| 90024 | <10 | <10* | 10 |
| 90052 | <10 | <10* | 10 |
| 90023 | <10 | <10* | 10 |
| 90049 | <10 | 40 | 40 |
| 90068 | <10 | 10 | 10 |
| 90046 | <10 | 40 | 20 |
| 5. Inactivated BinJ/JEVNSW22, higher dose, no emulsigen, clarified supernatant | 90044 | <10 | 10 | ND |
| 90056 | <10 | 80 | ND |
| 90088 | <10 | <10* | ND |
| 90089 | <10 | 40 | ND |
| 90002 | <10 | 80 | ND |
| 90031 | <10 | 10 | ND |
| 90028 | <10 | <10* | ND |
| 90061 | <10 | 80 | ND |
| 90047 | <10 | 160 | ND |

* Partial neutralisation seen but did not reach cut-off threshold.

# vaccinated animal with breakthrough JEV infection post challenge

**Table S7** Assessment of multiparous sows pre-vaccination with pan-orthoflavivirus (mAb 6B6C-1) blocking ELISA.

| **Pig ID** | **Pen ID** | **PI Values*** | **Interpretation** |
| --- | --- | --- | --- |
| 35393 | 1 | 7.71 | Negative |
| 1333 | 2 | 3.91 | Negative |
| 978 | 3 | -25.20 | Negative |
| 1611 | 4 | 14.28 | Negative |
| 582 | 5 | 5.68 | Negative |
| 34915 | 6 | 13.98 | Negative |
| 2031 | 7 | 12.36 | Negative |
| 1311 | 8 | 12.39 | Negative |
| 6848 | 9 | 18.61 | Negative |
| 35396 | 10 | 19.41 | Negative |
| Positive control# | N/A | **94.91** | **Positive** |

*Percent inhibition of >30% is positive

#positive control pig – naturally infected with JEV

**Table S8.** Serological response of sows to BinJ/JEVNSW22 vaccination as assessed in the JEV bELISA. Pigs were vaccinated with a priming dose on Day 0, with booster vaccinations occurring on days 28 and 70.

|  |  | **PI values*** | | | | | |
| --- | --- | --- | --- | --- | --- | --- | --- |
| **Pig ID** | **Pen ID** | **Day 0** | **Day 14** | **Day 28** | **Day 42** | **Day 56** | **Day 70** |
| 35393 | 1 | 31.90 | **88.98** | **76.88** | **94.66** | NS# | NS# |
| 1333 | 2 | 30.26 | **87.88** | **84.75** | **94.28** | **95.82** | **95.35** |
| 978 | 3 | 48.58 | **94.14** | **88.18** | **94.99** | **95.27** | **94.36** |
| 1611 | 4 | 45.54 | **89.58** | **77.16** | **94.74** | **89.18** | **94.74** |
| 582 | 5 | **65.13** | **91.40** | **88.64** | **94.82** | **92.91** | **95.58** |
| 34915 | 6 | 38.75 | **87.96** | **82.09** | **94.99** | **95.73** | **96.70** |
| 2031 | 7 | 21.59 | **78.99** | **72.63** | **95.04** | **92.80** | **95.72** |
| 1311 | 8 | 23.54 | **90.22** | **91.90** | **96.36** | **94.44** | **95.10** |
| 6848 | 9 | 20.43 | **76.89** | **59.79** | **95.13** | **95.33** | **94.33** |
| 35396 | 10 | 27.42 | **92.38** | **92.50** | **94.54** | **95.40** | **93.91** |

*PI (percent inhibition) values of >60% are positive, <40% are negative and 40 – 60% equivocal.

#NS – not sampled

**Table S9.** Titres of anti-JEV antibodies in sows at different times post-vaccination with BinJ/JEVNSW22 estimated from limiting dilution when tested using the JEV blocking ELISA

|  |  | **Titres*** | | | | | |
| --- | --- | --- | --- | --- | --- | --- | --- |
| **Pig ID** | **Pen ID** | **Day 0** | **Day 14** | **Day 28** | **Day 42** | **Day 56** | **Day 70** |
| 35393 | 1 | <10 | 80 | 20 | 1280 | NS | NS |
| 1333 | 2 | <10 | 40 | 20 | 640 | 320 | 320 |
| 978 | 3 | 10 | 160 | 40 | 640 | 160 | 80 |
| 1611 | 4 | 10 | 80 | 40 | 640 | 160 | 80 |
| 582 | 5 | 10 | 160 | 80 | 640 | 320 | 160 |
| 34915 | 6 | <10 | 80 | 40 | 640 | 320 | 160 |
| 2031 | 7 | <10 | 40 | 20 | 640 | 320 | 320 |
| 1311 | 8 | <10 | 160 | 80 | 2560 | 1280 | 1280 |
| 6848 | 9 | <10 | 20 | 10 | 1280 | 320 | 320 |
| 35396 | 10 | <10 | 160 | 80 | 2560 | 640 | 640 |

*End-point titres were defined as the highest dilution that gave a PI>40%

**Table S10.** Neutralising antibody titres of anti-JEV antibodies in sows as PRNT50 at different times post-vaccination with BinJ/JEVNSW22.

|  |  | **PRNT50 Titre*** | | |
| --- | --- | --- | --- | --- |
| **Pig ID** | **Pen ID** | **Day 0** | **Day 14** | **Day 28** |
| 35393 | 1 | <10 | 20 | 20 |
| 1333 | 2 | <10 | 20 | 20 |
| 978 | 3 | <10 | 40 | 40 |
| 1611 | 4 | <10 | 20 | 20 |
| 582 | 5 | <10 | 80 | 10 |
| 34915 | 6 | <10 | 40 | 20 |
| 2031 | 7 | <10 | 40 | 40 |
| 1311 | 8 | <10 | 80 | 40 |
| 6848 | 9 | <10 | 80 | 40 |
| 35396 | 10 | <10 | 80 | 40 |

* The PRNT50 titre was defined as the highest dilution that results in a 50% reduction of plaques.

**
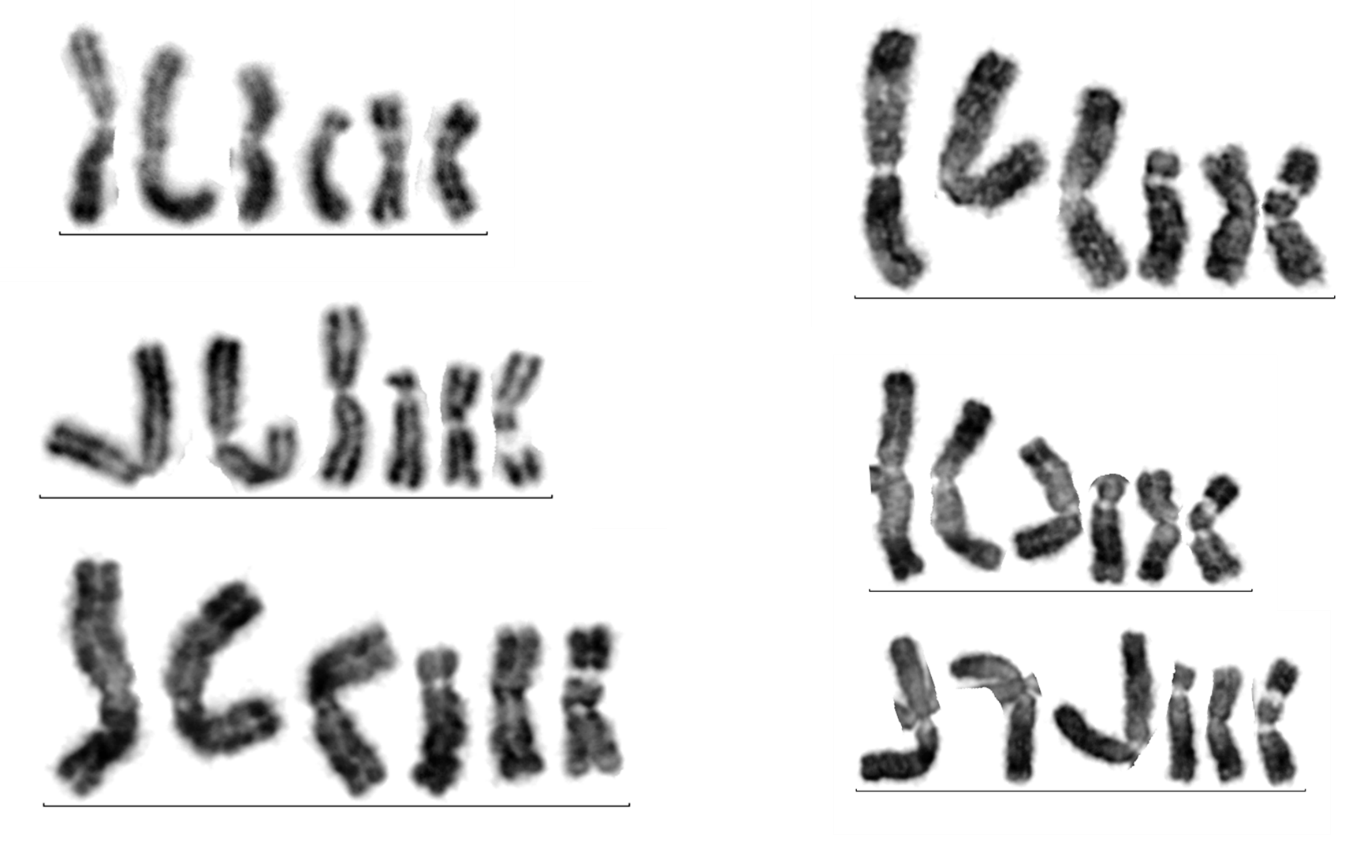
**

**Figure S1.** Chromosome analysis of the mosquito cell line C6/36 *Aedes albopictus*. Chromosome enumeration of 20 C6/36 cells revealed the presence of six chromosomes. G-banding was of low resolution but showed that the karyotype appears to be abnormal with only one set of homologues identified.

**
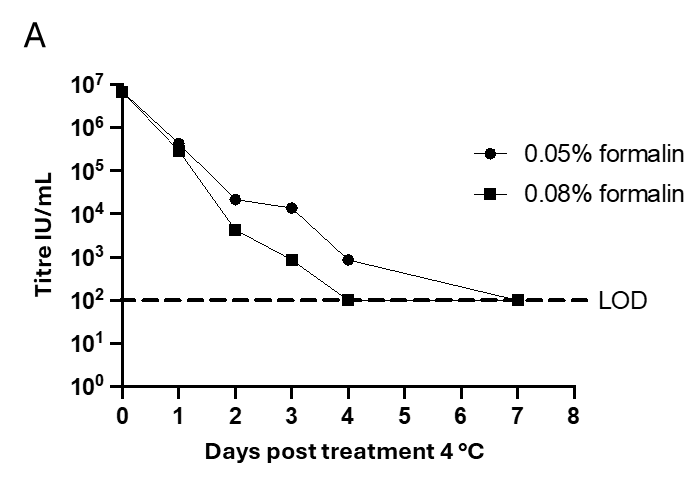
**

**
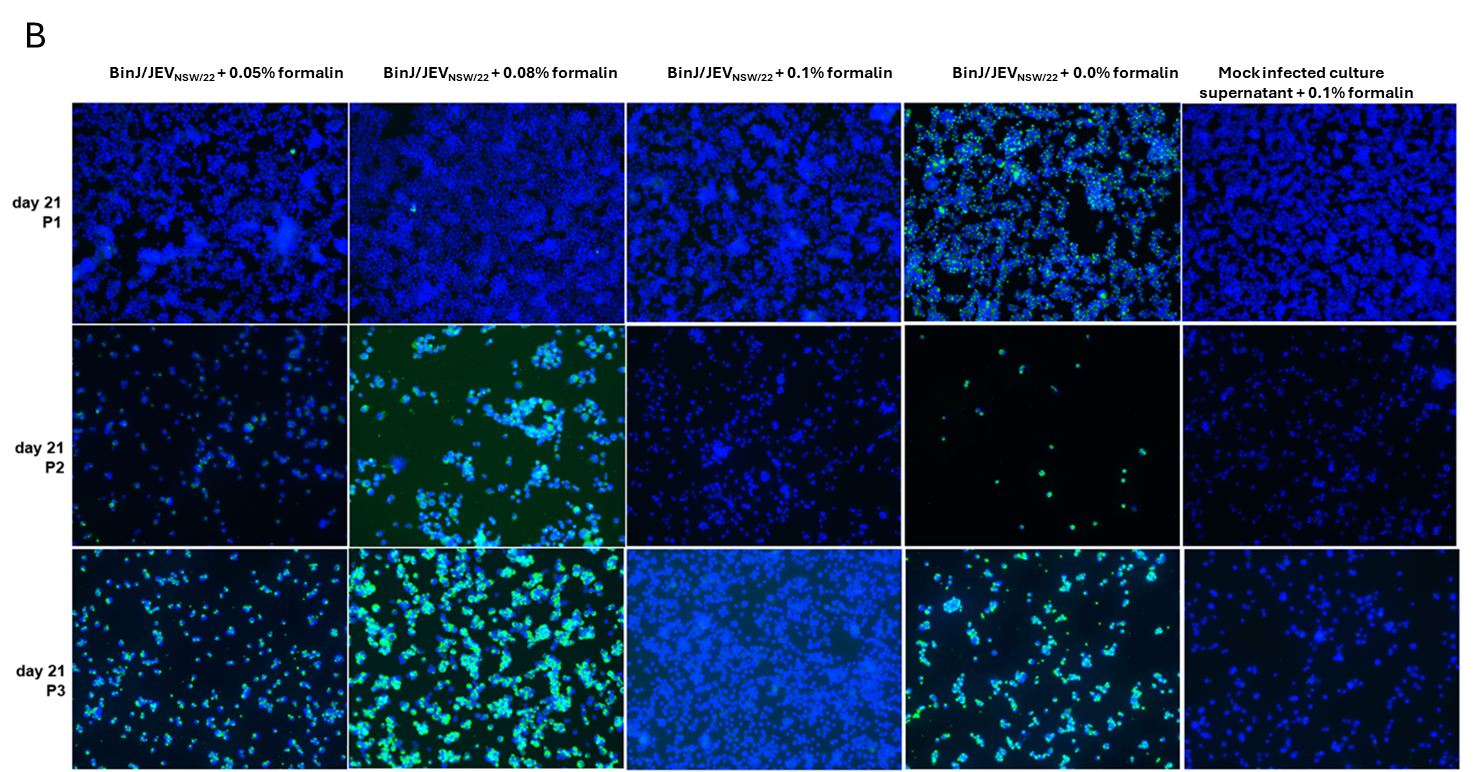
**


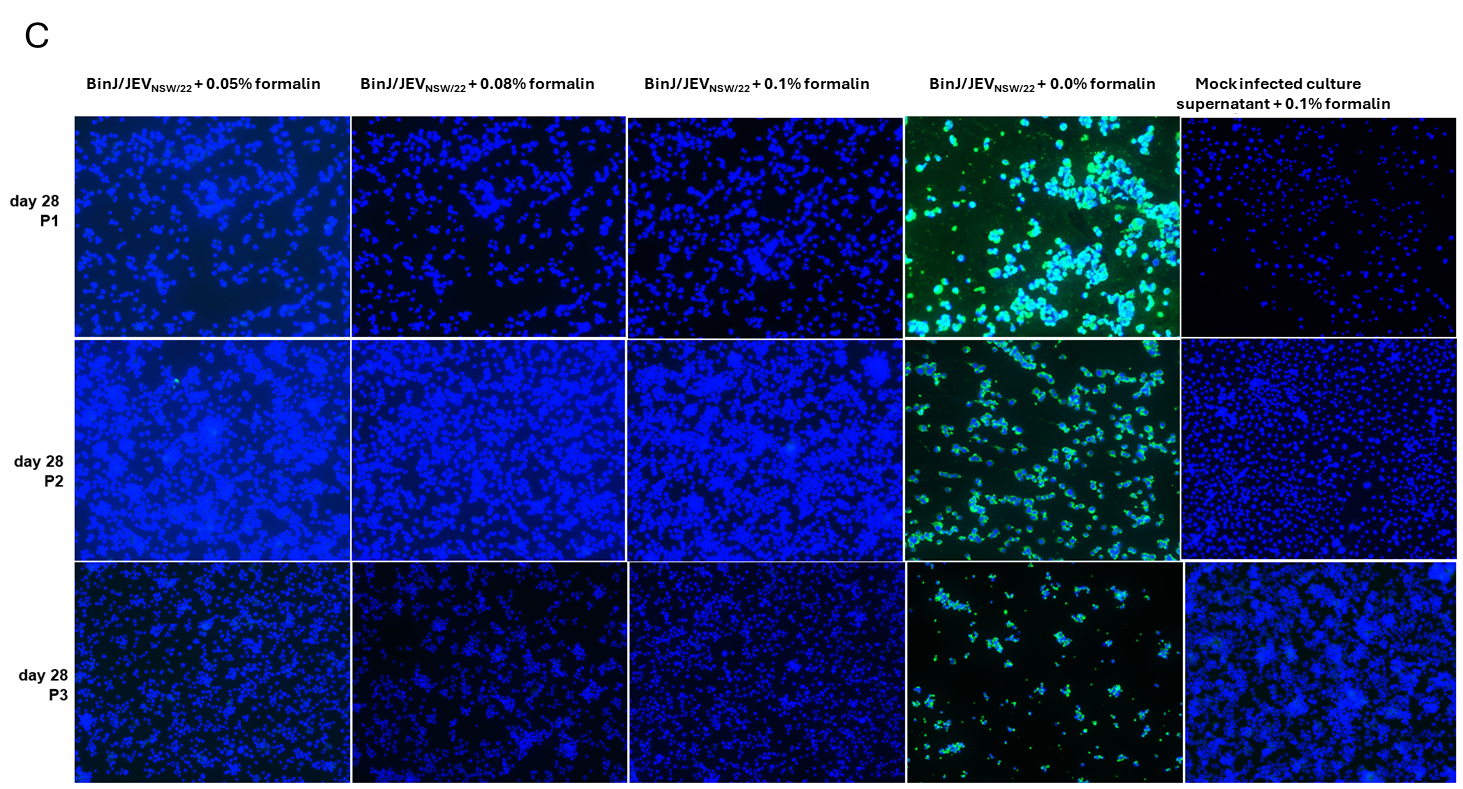


**Figure S2**. Inactivation kinetics of BinJ/JEVNSW/22 with various concentrations of formalin (data from Table S3). **A**) Inactivation of BinJ/JEVNSW/22 as clarified cell culture supernatant (RPMI/2% FBS) following addition of 0.05% (circles) or 0.08% (squares) formalin and infectious titre determined by TCID50 of daily samples post formalin addition. **B, C**) Representative IFA images of C6/36 cell monolayers infected with the treated BinJ/JEVNSW/22 solutions. Panel B displays the results following harvesting of the culture supernatant 21 days after formalin addition and passaged 3 times, while panel C shows the results following culture supernatant harvesting 28 days post-formalin addition. Blue staining is the cell nuclei. Green staining is detection of replicating BinJ/JEVNSW/22.


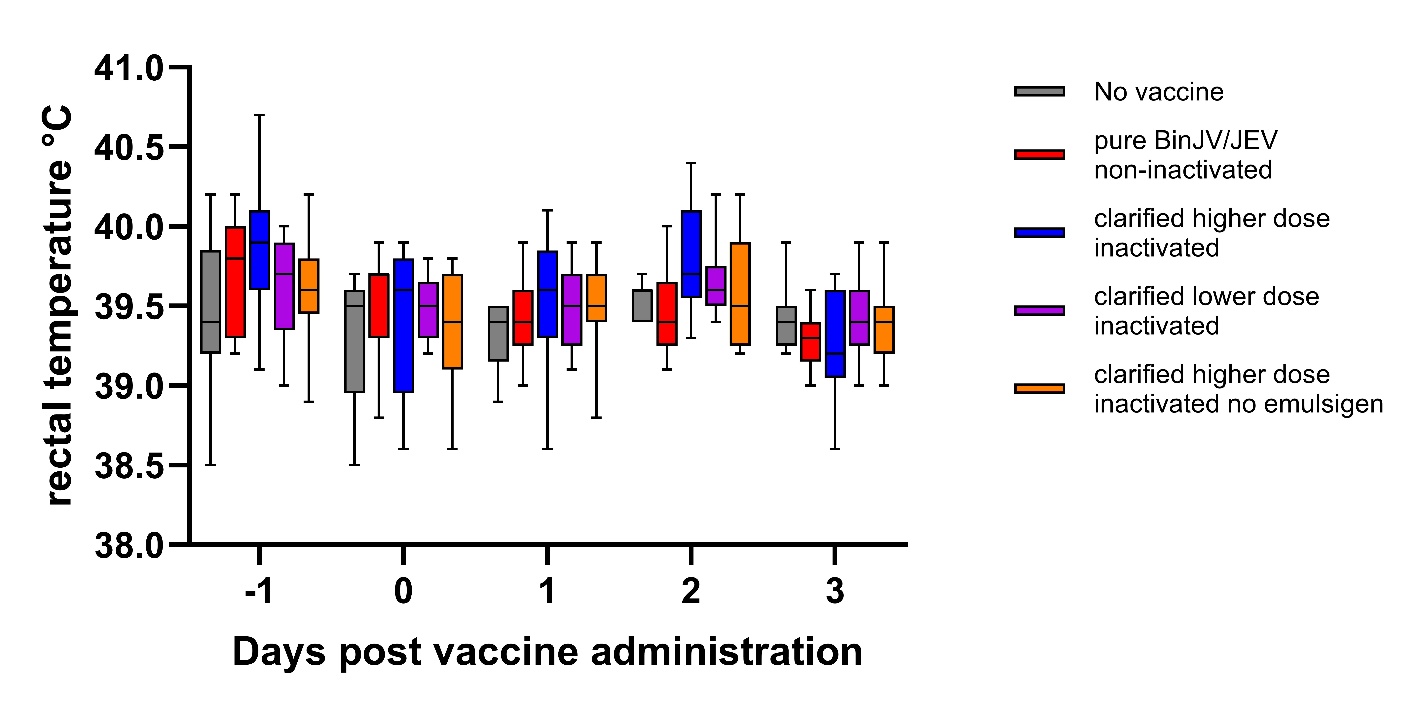


**Figure S3.** Rectal temperature of pigs measured each day before and after administration of the priming dose of each BinJ/JEVNSW/22 vaccine preparation, for a total of 5 days. Data are plotted as a box and whisker plot, the line marks the median and the whiskers extend to the minimum and maximum values. Each vaccine group comprised 9 animals. BinJ/JEVNSW/22 vaccine formulations: 1) no vaccine (sham-vaccine (cell culture medium)) grey; 2) purified virions, non-inactivated with Advax adjuvant, red; 3) Formalin-inactivated BinJ/JEVNSW/22 as clarified cell culture supernatant, higher concentration with Emulsigen/aluminium hydroxide gel adjuvant, blue; 4) Formalin-inactivated BinJ/JEVNSW/22 as clarified cell culture supernatant, lower concentration with Emulsigen/aluminium hydroxide gel adjuvant, purple; 5) Formalin-inactivated BinJ/JEVNSW/22 as clarified cell culture supernatant, higher concentration with aluminium hydroxide gel adjuvant only, orange. A linear mixed-effects model fitted using restricted maximum likelihood (REML) in R (Version 4.5.1 with the lme4 package version 1.1-33) to evaluate the effects of vaccine group, day post-vaccination, and their interaction on body temperature with Pig ID included as a random effect. No statistically significant effects were observed for Group (p=0.40), Day (p=0.23), or their interaction (p=0.95), indicating that body temperature remained consistent across groups and time points, including the sham vaccination

**
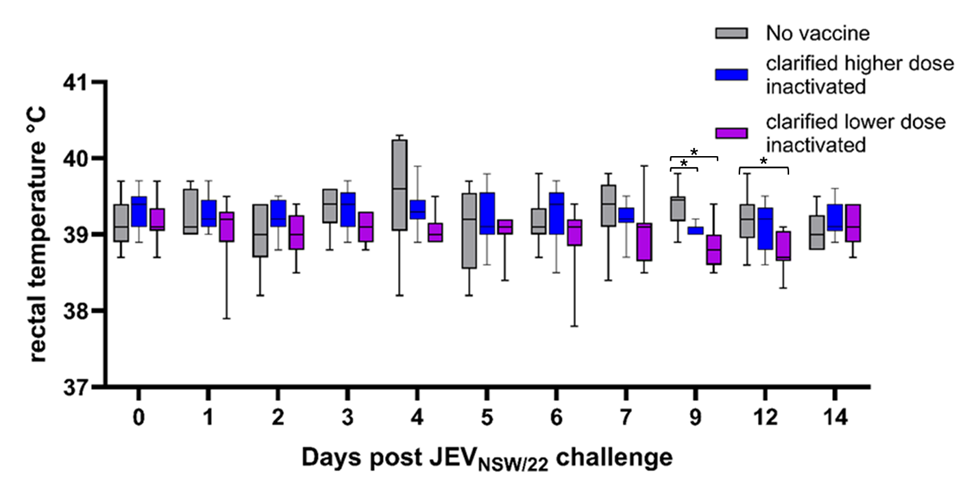
**

**Figure S4.** Rectal temperature of pigs measured each day after challenge with JEVNSW/22.Data are plotted as a box and whisker plot, the line marks the median and the whiskers extend to the minimum and maximum values. Each vaccine group comprised 9 animals. BinJ/JEVNSW/22 vaccine formulations: Grp 1) no vaccine (sham-vaccine (cell culture medium)) grey; Grp 3) Formalin-inactivated BinJ/JEVNSW/22 as clarified cell culture supernatant, higher concentration with Emulsigen/aluminium hydroxide gel adjuvant, blue; Grp 4) Formalin-inactivated BinJ/JEVNSW/22 as clarified cell culture supernatant, lower concentration with Emulsigen/aluminium hydroxide gel adjuvant, purple. A linear mixed-effects model was fitted using restricted maximum likelihood (REML) in R (Version 4.5.1 with the lme4 version 1.1-33). The model indicated that both Group (vaccine type or no vaccine) and Day influenced temperature (p<0.05) with Pig ID included as a random effect. Post-hoc pairwise comparisons of estimated marginal means (EMMs) were conducted using Tukey’s honestly significant difference (HSD) test (emmeans package v1.11.2-8). Statistically significant differences (adjusted p<0.05) between groups within each day are indicated (*).


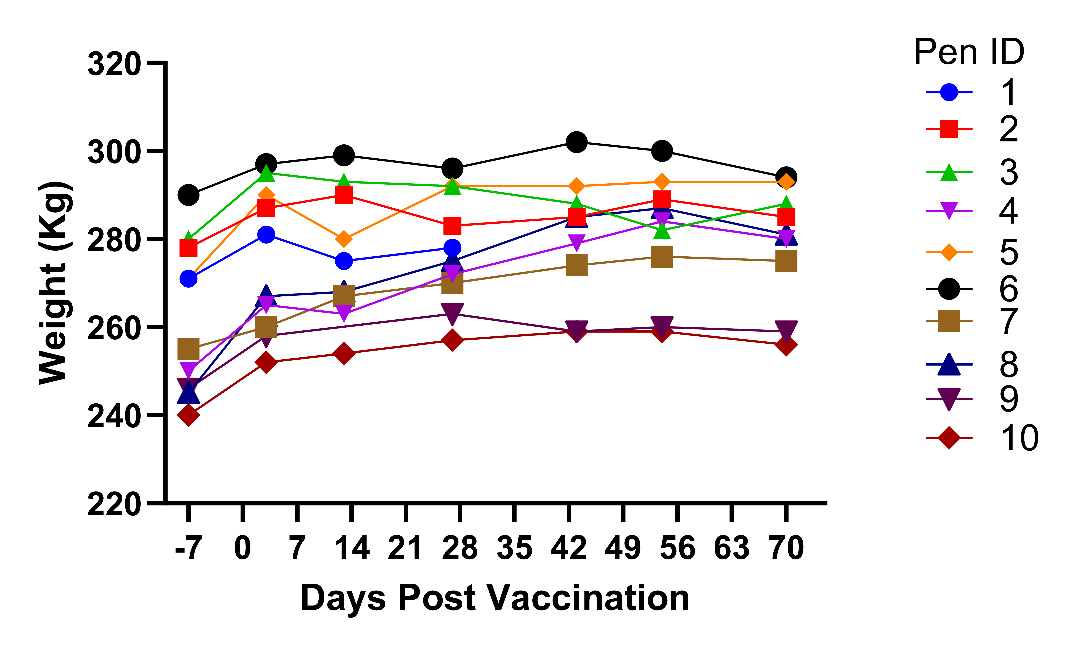


**Fig S5.** Body weights of multiparous sows over the vaccine study trial. Each curve represents an individual animal.
